# Supplementary material for: Evolution of Phytochemical Variation in Myrtle (Myrtus communis L.) Organs during Different Phenological Stages
Source: MDPI journal article supplement (doi:10.3390/horticulturae8090757), 2022-08-23
Supplement: s1 [file s1]

**Table S1.** Correlation between phytochemical compositions.

| Variables                              | x <sub>1</sub> | x <sub>2</sub> | x <sub>3</sub> | x <sub>4</sub> | x <sub>5</sub> | x <sub>6</sub> | x <sub>7</sub> | x <sub>8</sub> | x <sub>9</sub> | x <sub>10</sub> | x <sub>11</sub> | x <sub>12</sub> | x <sub>13</sub> | x <sub>14</sub> | x <sub>15</sub> | x <sub>16</sub> | x <sub>17</sub> | x <sub>18</sub> | x <sub>19</sub> | x <sub>20</sub> | x <sub>21</sub> | x <sub>22</sub> | x <sub>23</sub> | x <sub>24</sub> | x <sub>25</sub> | x <sub>26</sub> | x <sub>27</sub> |  |
|----------------------------------------|----------------|----------------|----------------|----------------|----------------|----------------|----------------|----------------|----------------|-----------------|-----------------|-----------------|-----------------|-----------------|-----------------|-----------------|-----------------|-----------------|-----------------|-----------------|-----------------|-----------------|-----------------|-----------------|-----------------|-----------------|-----------------|--|
| Isobutyl isobutyrate (x <sub>1</sub> ) | <b>1</b>       |                |                |                |                |                |                |                |                |                 |                 |                 |                 |                 |                 |                 |                 |                 |                 |                 |                 |                 |                 |                 |                 |                 |                 |  |
| α-Thujene (x <sub>2</sub> )            | <b>-0.53</b>   | <b>1</b>       |                |                |                |                |                |                |                |                 |                 |                 |                 |                 |                 |                 |                 |                 |                 |                 |                 |                 |                 |                 |                 |                 |                 |  |
| α-Pinene (x <sub>3</sub> )             | 0.22           | 0.38           | <b>1</b>       |                |                |                |                |                |                |                 |                 |                 |                 |                 |                 |                 |                 |                 |                 |                 |                 |                 |                 |                 |                 |                 |                 |  |
| β-Pinene (x <sub>4</sub> )             | <b>0.62</b>    | -0.27          | 0.44           | <b>1</b>       |                |                |                |                |                |                 |                 |                 |                 |                 |                 |                 |                 |                 |                 |                 |                 |                 |                 |                 |                 |                 |                 |  |
| δ-3-Carene (x <sub>5</sub> )           | <b>0.65</b>    | 0.02           | <b>0.79</b>    | <b>0.80</b>    | <b>1</b>       |                |                |                |                |                 |                 |                 |                 |                 |                 |                 |                 |                 |                 |                 |                 |                 |                 |                 |                 |                 |                 |  |
| p-Cymene (x <sub>6</sub> )             | <b>0.60</b>    | 0.12           | <b>0.87</b>    | <b>0.71</b>    | <b>0.93</b>    | <b>1</b>       |                |                |                |                 |                 |                 |                 |                 |                 |                 |                 |                 |                 |                 |                 |                 |                 |                 |                 |                 |                 |  |
| Limonene (x <sub>7</sub> )             | -0.42          | 0.43           | 0.09           | -0.18          | -0.17          | -0.25          | <b>1</b>       |                |                |                 |                 |                 |                 |                 |                 |                 |                 |                 |                 |                 |                 |                 |                 |                 |                 |                 |                 |  |
| 1,8-Cineol (x <sub>8</sub> )           | <b>0.89</b>    | <b>-0.71</b>   | -0.07          | <b>0.66</b>    | 0.44           | 0.39           | <b>-0.58</b>   | <b>1</b>       |                |                 |                 |                 |                 |                 |                 |                 |                 |                 |                 |                 |                 |                 |                 |                 |                 |                 |                 |  |
| γ-Terpinene (x <sub>9</sub> )          | -0.35          | 0.41           | -0.11          | -0.31          | -0.06          | -0.19          | -0.20          | -0.37          | <b>1</b>       |                 |                 |                 |                 |                 |                 |                 |                 |                 |                 |                 |                 |                 |                 |                 |                 |                 |                 |  |
| Linalool (x <sub>10</sub> )            | -0.19          | -0.31          | <b>-0.86</b>   | <b>-0.68</b>   | <b>-0.85</b>   | <b>-0.81</b>   | 0.00           | -0.05          | -0.07          | <b>1</b>        |                 |                 |                 |                 |                 |                 |                 |                 |                 |                 |                 |                 |                 |                 |                 |                 |                 |  |
| α-Terpineol (x <sub>11</sub> )         | <b>-0.61</b>   | 0.03           | -0.24          | -0.46          | <b>-0.60</b>   | -0.43          | 0.05           | -0.49          | -0.02          | 0.41            | <b>1</b>        |                 |                 |                 |                 |                 |                 |                 |                 |                 |                 |                 |                 |                 |                 |                 |                 |  |
| Methyl chavicol (x <sub>12</sub> )     | 0.02           | 0.48           | <b>0.89</b>    | 0.01           | 0.49           | <b>0.62</b>    | 0.23           | -0.36          | -0.07          | <b>-0.57</b>    | -0.02           | <b>1</b>        |                 |                 |                 |                 |                 |                 |                 |                 |                 |                 |                 |                 |                 |                 |                 |  |
| β-Citronellol (x <sub>13</sub> )       | 0.39           | -0.04          | <b>0.67</b>    | 0.09           | 0.47           | <b>0.66</b>    | -0.40          | 0.13           | -0.15          | -0.34           | 0.05            | <b>0.75</b>     | <b>1</b>        |                 |                 |                 |                 |                 |                 |                 |                 |                 |                 |                 |                 |                 |                 |  |
| Linalyl acetate (x <sub>14</sub> )     | -0.33          | -0.19          | -0.45          | -0.37          | <b>-0.50</b>   | -0.41          | -0.44          | -0.14          | 0.33           | 0.48            | <b>0.79</b>     | -0.32           | 0.05            | <b>1</b>        |                 |                 |                 |                 |                 |                 |                 |                 |                 |                 |                 |                 |                 |  |
| Methyl citronellate (x <sub>15</sub> ) | -0.47          | 0.20           | -0.15          | -0.38          | -0.29          | -0.24          | -0.43          | -0.28          | <b>0.55</b>    | -0.02           | 0.07            | -0.13           | -0.05           | 0.24            | <b>1</b>        |                 |                 |                 |                 |                 |                 |                 |                 |                 |                 |                 |                 |  |
| α-Terpinyl acetate (x <sub>16</sub> )  | -0.26          | -0.33          | -0.23          | -0.20          | -0.43          | -0.20          | <b>-0.51</b>   | 0.03           | -0.21          | 0.27            | <b>0.65</b>     | -0.19           | 0.21            | <b>0.62</b>     | 0.45            | <b>1</b>        |                 |                 |                 |                 |                 |                 |                 |                 |                 |                 |                 |  |
| Neryl acetate (x <sub>17</sub> )       | -0.23          | -0.32          | -0.47          | -0.29          | -0.32          | <b>-0.62</b>   | 0.25           | -0.19          | 0.35           | 0.32            | -0.01           | -0.37           | -0.46           | 0.11            | 0.07            | -0.24           | <b>1</b>        |                 |                 |                 |                 |                 |                 |                 |                 |                 |                 |  |
| Geranyl acetate (x <sub>18</sub> )     | <b>-0.61</b>   | <b>0.52</b>    | -0.30          | <b>-0.59</b>   | -0.41          | -0.48          | 0.00           | <b>-0.55</b>   | <b>0.80</b>    | 0.14            | -0.02           | -0.18           | -0.38           | 0.14            | <b>0.76</b>     | -0.08           | 0.32            | <b>1</b>        |                 |                 |                 |                 |                 |                 |                 |                 |                 |  |
| Methyleugenol (x <sub>19</sub> )       | <b>-0.74</b>   | <b>0.56</b>    | -0.23          | <b>-0.52</b>   | -0.48          | <b>-0.54</b>   | <b>0.53</b>    | <b>-0.68</b>   | 0.32           | 0.10            | -0.03           | -0.11           | <b>-0.60</b>    | -0.25           | 0.49            | -0.16           | 0.31            | <b>0.76</b>     | <b>1</b>        |                 |                 |                 |                 |                 |                 |                 |                 |  |
| trans-Caryophyllene (x <sub>20</sub> ) | -0.39          | 0.42           | -0.12          | -0.46          | -0.14          | -0.26          | -0.14          | -0.46          | <b>0.98</b>    | 0.02            | 0.01            | 0.00            | -0.09           | 0.31            | <b>0.56</b>     | -0.22           | 0.40            | <b>0.84</b>     | 0.38            | <b>1</b>        |                 |                 |                 |                 |                 |                 |                 |  |
| α-Humulene (x <sub>21</sub> )          | -0.23          | 0.33           | -0.01          | -0.20          | 0.06           | -0.03          | -0.39          | -0.25          | <b>0.97</b>    | -0.14           | 0.02            | -0.01           | 0.04            | 0.42            | <b>0.55</b>     | -0.09           | 0.21            | <b>0.68</b>     | 0.12            | <b>0.93</b>     | <b>1</b>        |                 |                 |                 |                 |                 |                 |  |
| Spathulenol (x <sub>22</sub> )         | -0.04          | 0.00           | -0.18          | -0.30          | -0.04          | -0.12          | <b>-0.62</b>   | -0.02          | <b>0.84</b>    | 0.08            | -0.05           | -0.14           | 0.14            | 0.46            | <b>0.63</b>     | 0.07            | 0.30            | <b>0.63</b>     | 0.00            | <b>0.85</b>     | <b>0.89</b>     | <b>1</b>        |                 |                 |                 |                 |                 |  |
| Caryophyllene oxide (x <sub>23</sub> ) | -0.34          | 0.24           | -0.23          | -0.48          | -0.20          | -0.32          | -0.27          | -0.37          | <b>0.95</b>    | 0.14            | 0.10            | -0.10           | -0.06           | 0.47            | <b>0.55</b>     | -0.09           | 0.46            | <b>0.77</b>     | 0.25            | <b>0.97</b>     | <b>0.93</b>     | <b>0.91</b>     | <b>1</b>        |                 |                 |                 |                 |  |
| Essential oil (x <sub>24</sub> )       | 0.12           | -0.28          | 0.19           | -0.21          | 0.03           | 0.00           | 0.21           | -0.15          | -0.17          | 0.15            | 0.30            | 0.44            | 0.48            | 0.16            | -0.47           | -0.08           | 0.35            | -0.41           | -0.39           | -0.06           | -0.14           | -0.05           | 0.03            | <b>1</b>        |                 |                 |                 |  |
| Flavonoids (x <sub>25</sub> )          | <b>0.69</b>    | -0.36          | 0.17           | <b>0.63</b>    | <b>0.57</b>    | <b>0.56</b>    | <b>-0.65</b>   | <b>0.71</b>    | 0.03           | -0.24           | -0.13           | -0.08           | 0.37            | 0.27            | -0.29           | 0.02            | -0.34           | -0.47           | <b>-0.86</b>    | -0.10           | 0.23            | 0.24            | 0.00            | 0.01            | <b>1</b>        |                 |                 |  |
| Total phenols (x <sub>26</sub> )       | 0.47           | -0.07          | <b>0.62</b>    | <b>0.84</b>    | <b>0.78</b>    | <b>0.79</b>    | -0.15          | 0.40           | -0.25          | <b>-0.66</b>    | -0.08           | 0.32            | 0.39            | -0.08           | -0.49           | -0.09           | -0.47           | <b>-0.68</b>    | <b>-0.69</b>    | -0.38           | -0.09           | -0.28           | -0.38           | 0.07            | <b>0.73</b>     | <b>1</b>        |                 |  |
| IC <sub>50</sub> (x <sub>27</sub> )    | <b>-0.55</b>   | 0.17           | <b>-0.53</b>   | <b>-0.72</b>   | <b>-0.79</b>   | <b>-0.68</b>   | 0.16           | -0.39          | -0.03          | <b>0.57</b>     | 0.17            | -0.29           | -0.39           | 0.02            | <b>0.52</b>     | 0.33            | 0.09            | <b>0.54</b>     | <b>0.72</b>     | 0.07            | -0.16           | -0.02           | 0.04            | -0.34           | <b>-0.77</b>    | <b>-0.87</b>    | <b>1</b>        |  |

Values in bold are different from 0 with a significance level alpha=0.05
